# Supplementary figures and images for: Adherence to cardioprotective medications and mortality among patients with diabetes and ischemic heart disease
Source: Springer Nature journal article supplement (doi:10.1186/1471-2261-6-48), 2006-12-01

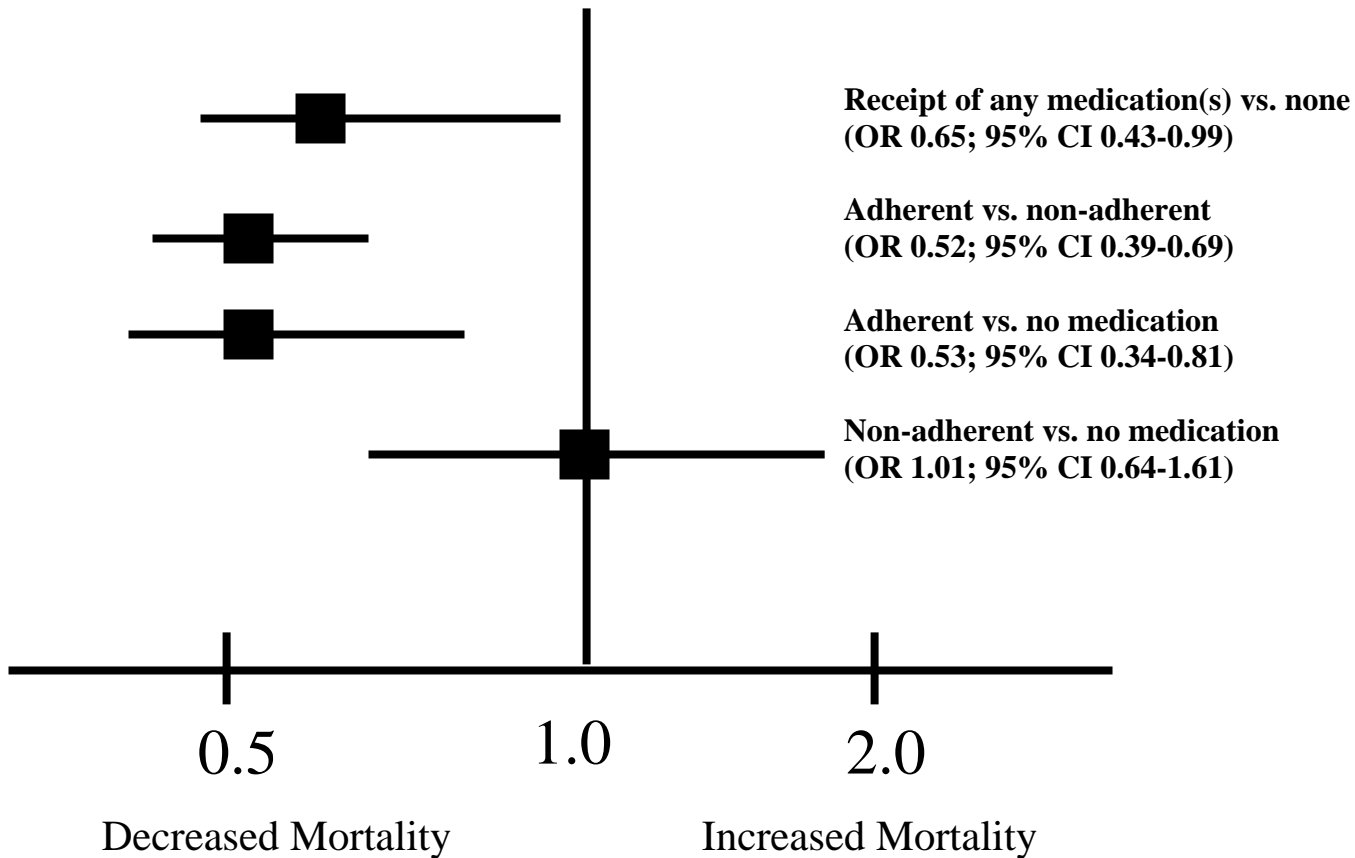

Supplement: 12872_2006_139_MOESM1_ESM.pdf [file 12872_2006_139_MOESM1_ESM.pdf]
